# Supplementary material
Source: PubMed Central journal article supplement (PMC3077445)

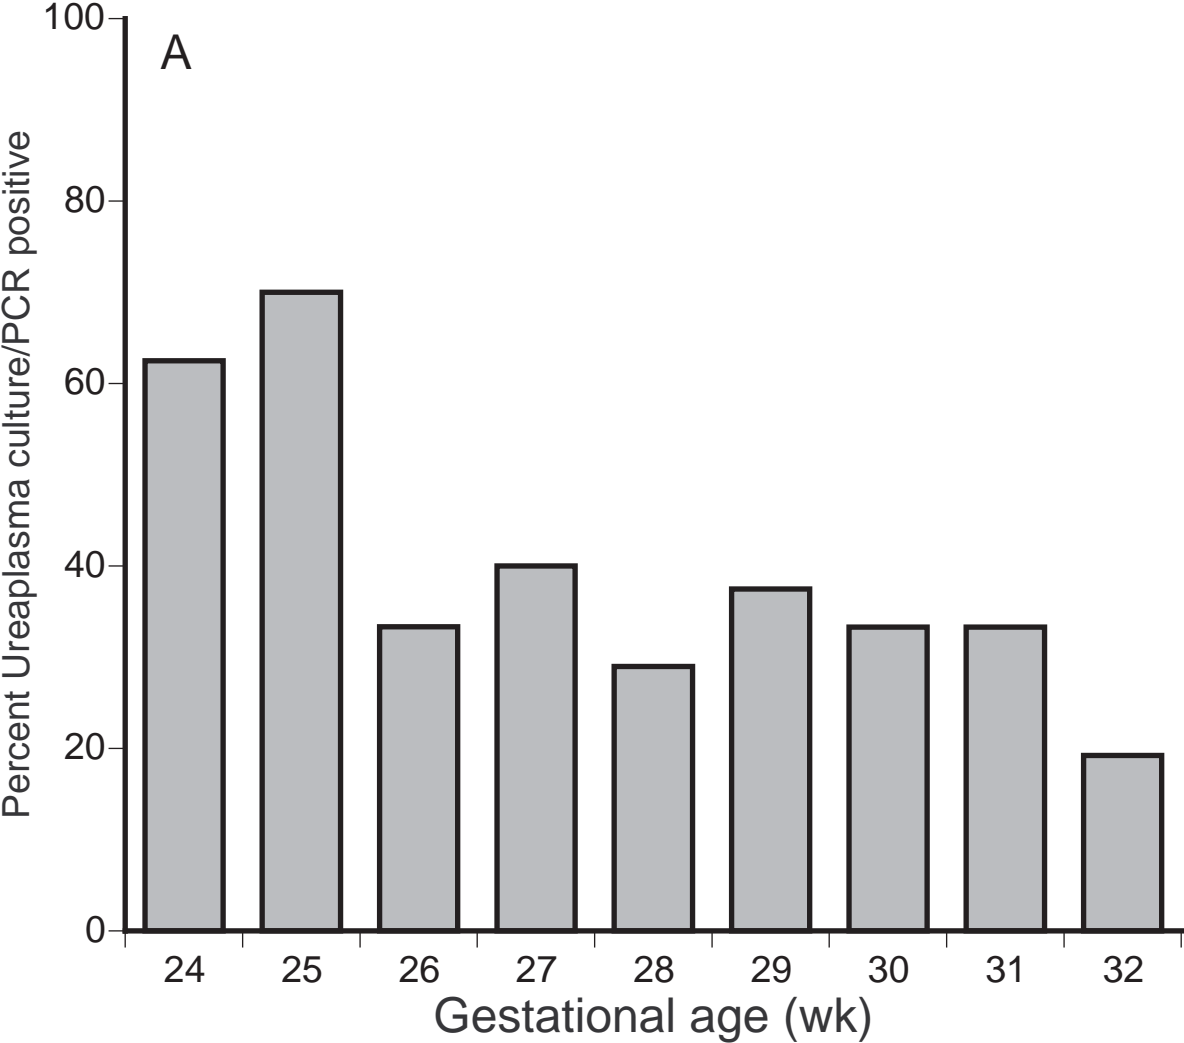

Supplement: NIHMS261196-supplement-1.pdf [file NIHMS261196-supplement-1.pdf]

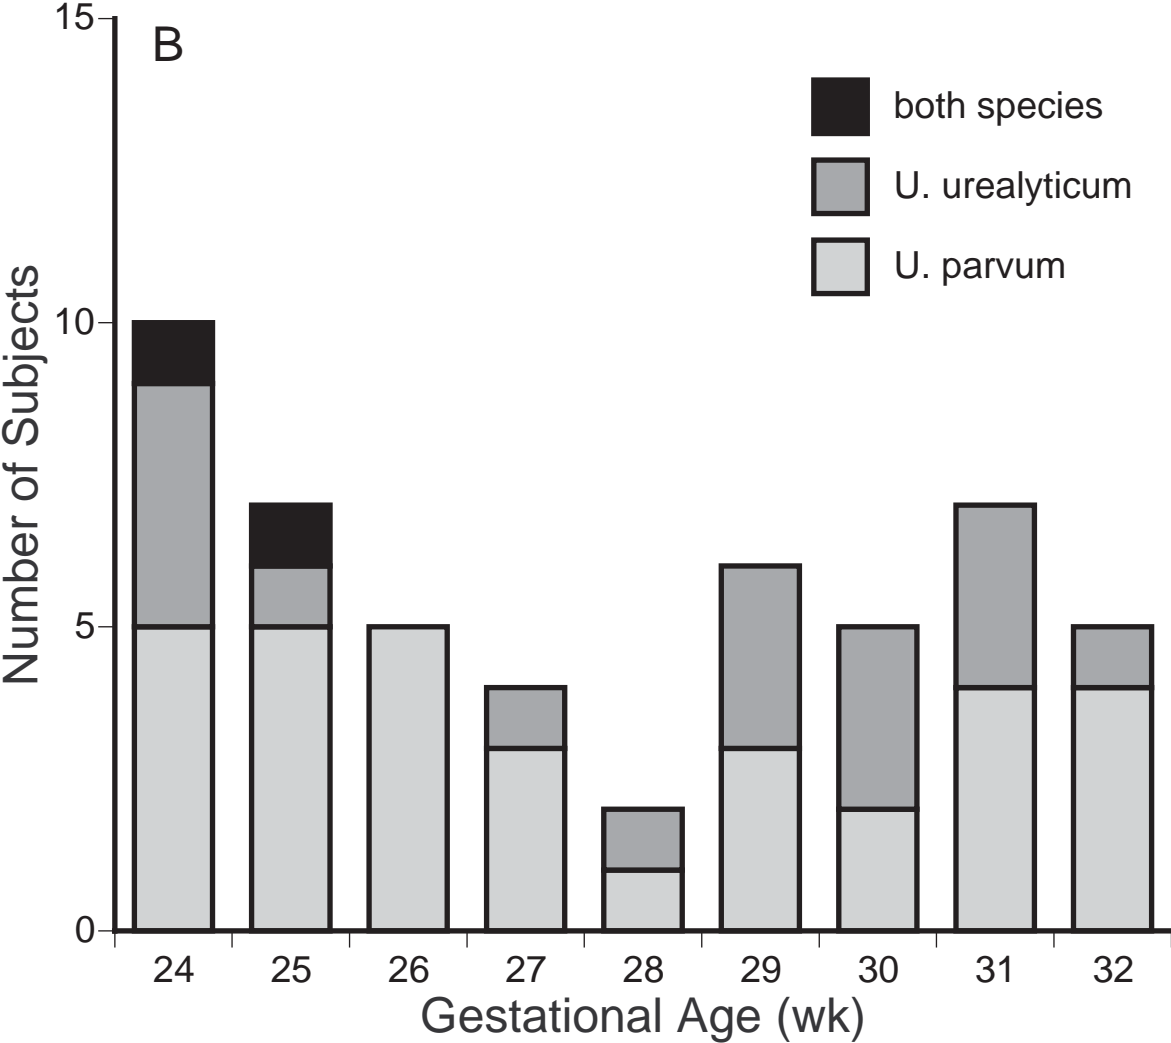

Supplement: NIHMS261196-supplement-2.pdf [file NIHMS261196-supplement-2.pdf]
